# Supplementary material for: Quasi-Static and Dynamic Behaviors of Helical Gear System with Manufacturing Errors
Source: Springer Nature journal article supplement (doi:10.1186/s10033-018-0238-1), 2018-04-26
Supplement: MOESM1 [file 15724102]

Chinese Journal of Mechanical Engineering

# Quasi-Static and Dynamic Behaviors of Helical Gear System with Manufacturing Errors

---

Bing Yuan

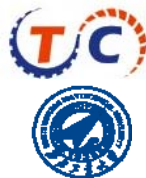

Shaanxi Engineering Laboratory for Transmissions and Controls

Northwestern Polytechnical University

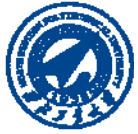

# Outline

---

- 1 Background and Motivation**
- 2 Improved LTCA Model**
- 3 Dynamic Model**
- 4 Results and Discussion**
- 5 Conclusions**

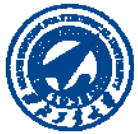

# Background and Motivation

- Helical /double-helical gears are widely used in **marine**, **automotive** and other industry applications

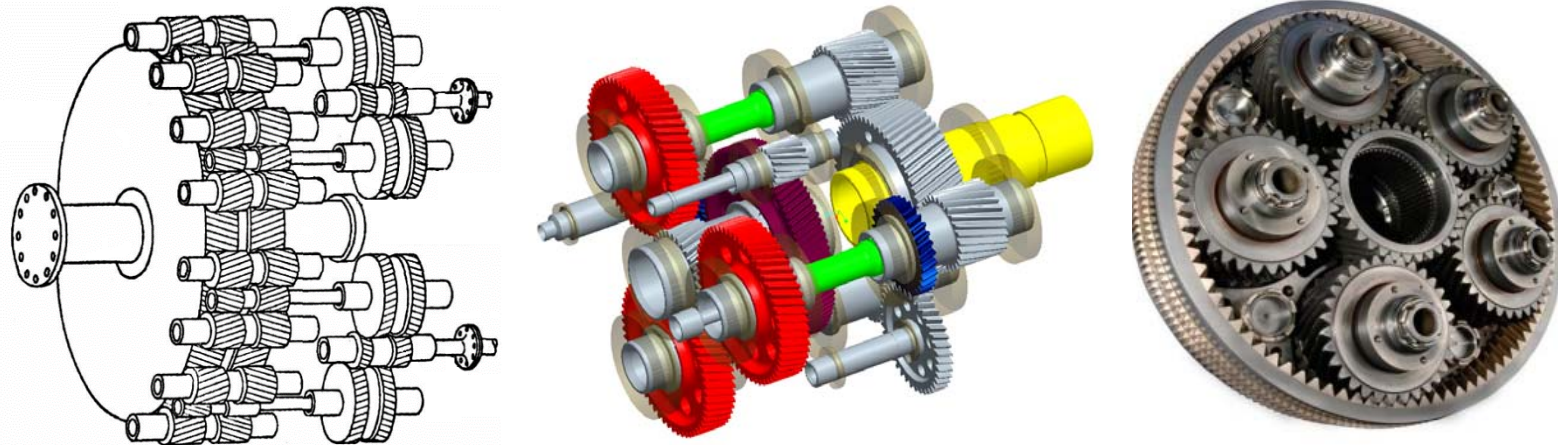

- Prediction and control of system vibration and noise
- 
- Relationship between coupled dynamic excitations and dynamic behaviors of gear system

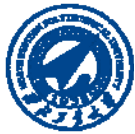

# Background and Motivation

- **Time-varying mesh stiffness** and **gear errors** are the two main excitations for gear transmission
- Gear errors include **short-term** and **long-term** components

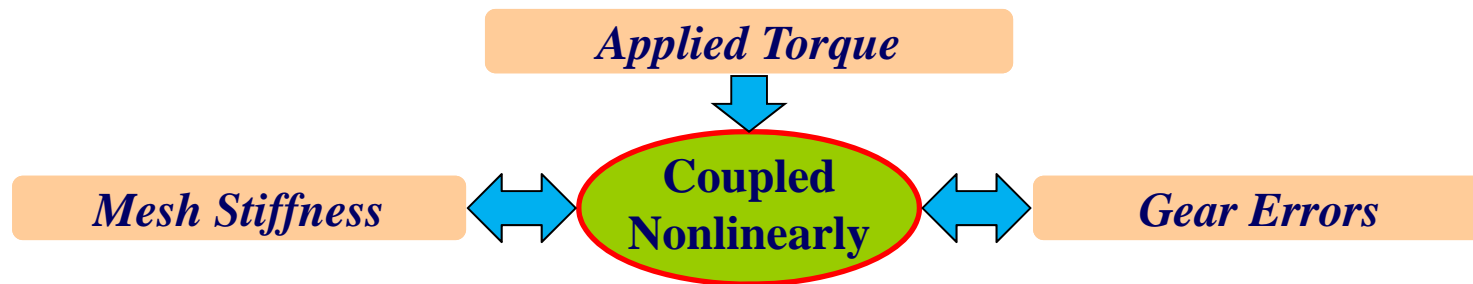

## □ Objective

- **To reveal the coupling mechanism** among time-varying mesh stiffness, gear errors and applied torque
- **To investigate the dynamic behavior** of helical gear system based on **coupling model of dynamic excitations**



# Outline

---

- ① Background and Motivation
- ② **Improved LTCA Model**
- ③ Dynamic Model
- ④ Results and Discussion
- ⑤ Conclusions

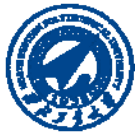

# Improved LTCA Model

## Technology Strategy

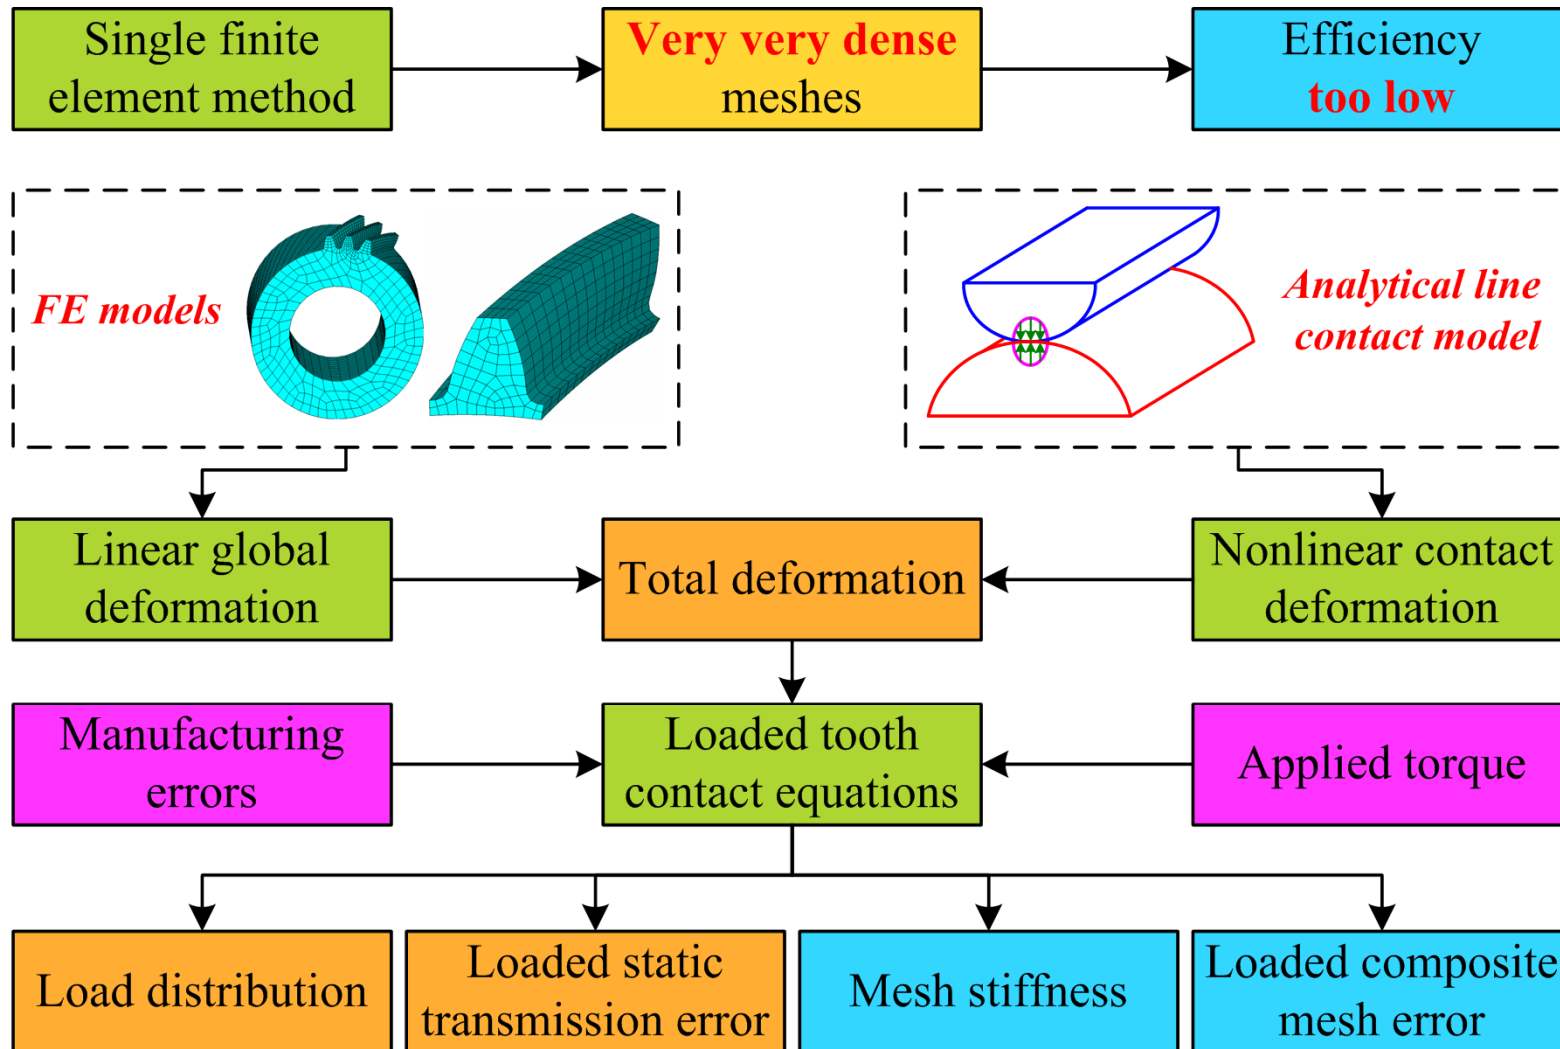

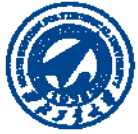

# Improved LTCA Model

## □ Plane of Action for a Helical Gear Pair

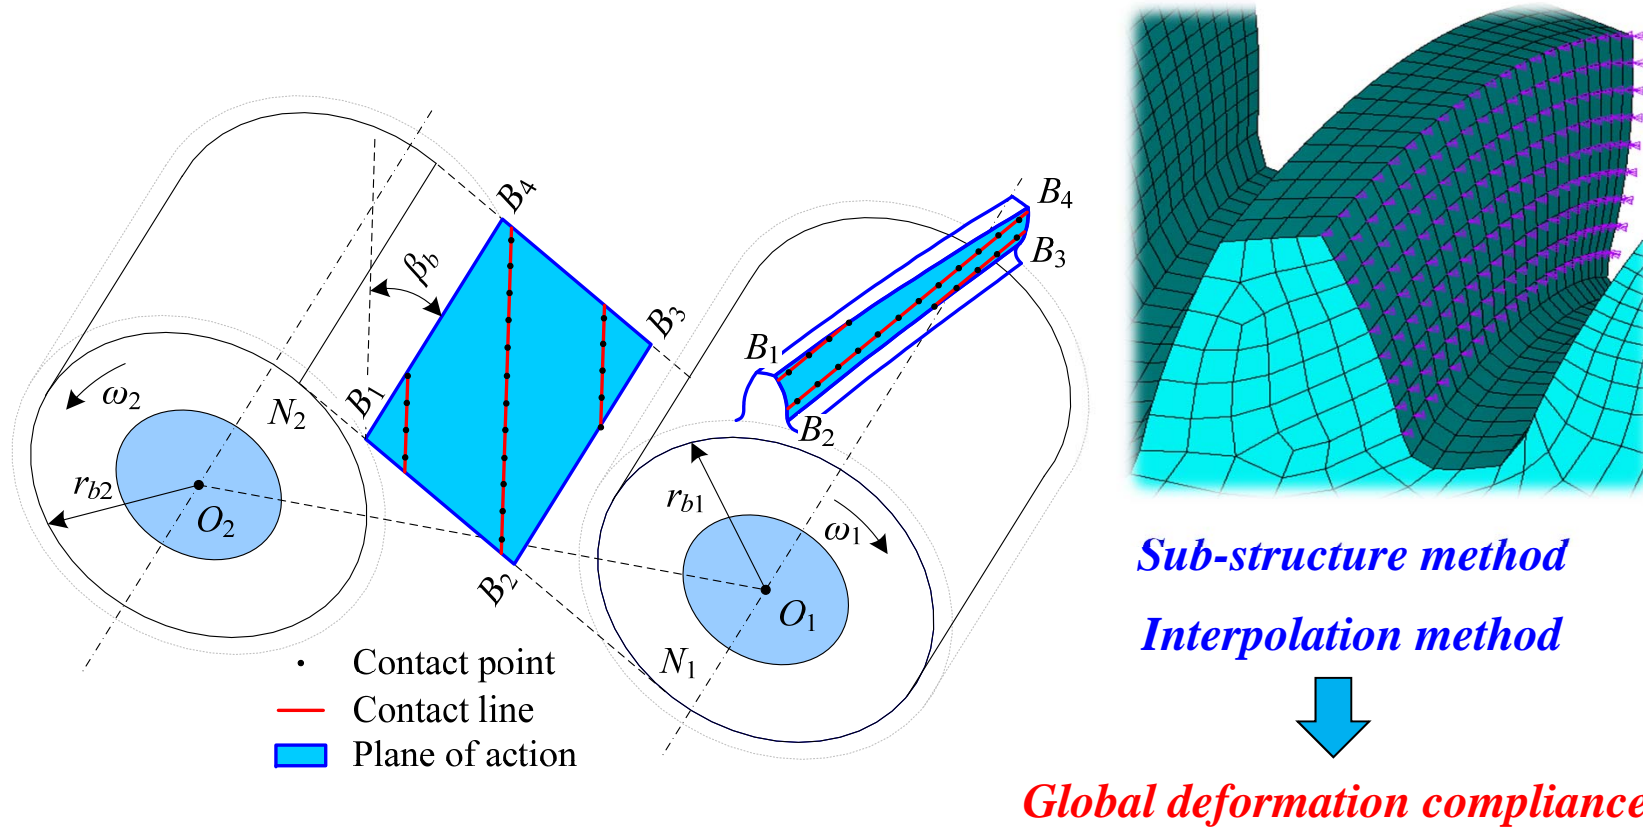

Three-dimensional line contact problem

Point contact problem

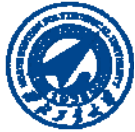

# Improved LTCA Model

## □ Tooth Contact in an Engagement Position

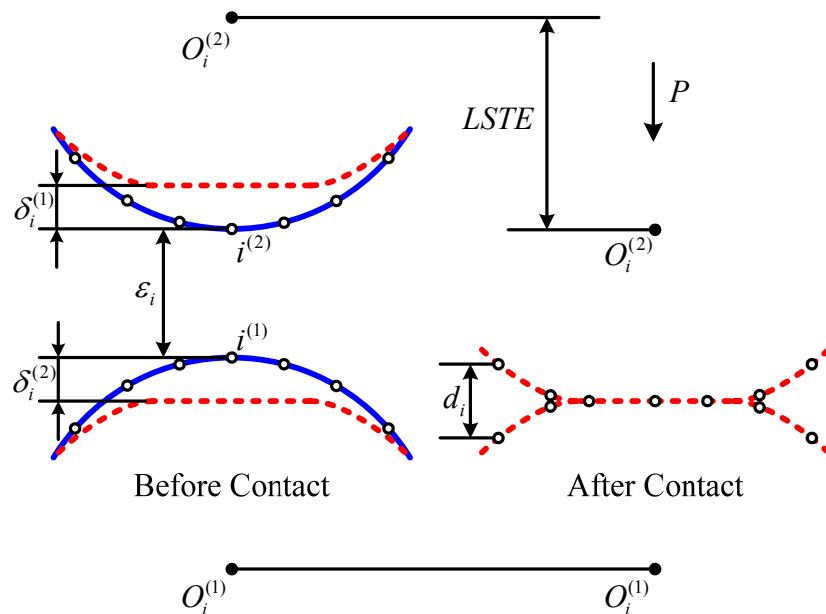

**Global Deformation**  $\delta_{Global} = [\lambda]_{Global} \{F\}$

**Local Contact Deformation**  $u_{Local}$

$$\begin{cases} [\lambda]_{Global} \{F\} + \{u\}_{Local} + \{\varepsilon\} - LSTE - \{d\} = 0 \\ \sum_{i=1}^n F_i = \{I\} \{F\} = P \\ \text{if } F_i > 0, d_i = 0 \\ \text{if } F_i = 0, d_i > 0 \end{cases}$$

- **Analytical Formula is employed to determine the Nonlinear Local Contact Deformation of gear teeth**
- **Iteration method is used to solve the LTCA equations to obtain the Load Distribution  $\{F\}$  and loaded Static Transmission Error  $LSTE$**





# Improved LTCA Model

## □ Mesh Stiffness and Loaded Composite Mesh Error

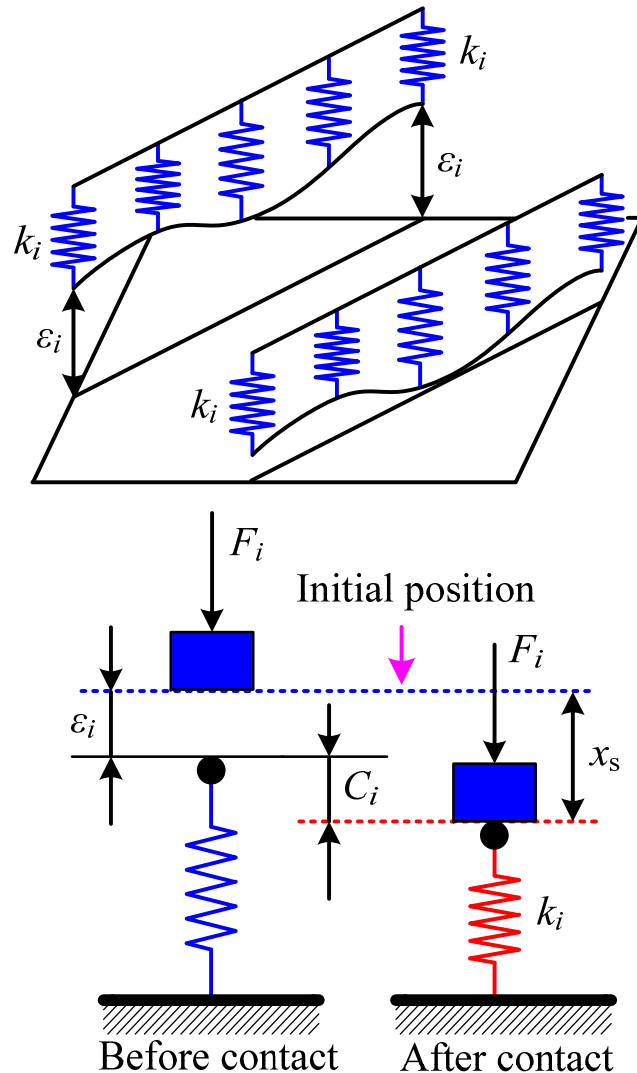

### ➤ Stiffness of Single Contact Point Pair

$$k_i = F_i / (x_s - \varepsilon_i)$$

### ➤ Mesh Stiffness of the Gear Pair

$$k_m = \sum_{i=1}^n k_i$$

### ➤ Static Load Balance Equation

$$\sum_{i=1}^n F_i = \sum_{i=1}^n [k_i (x_s - \varepsilon_i)] = \sum_{i=1}^n k_i x_s - \sum_{i=1}^n k_i \varepsilon_i$$

$$= k_m x_s - \sum_{i=1}^n k_i \varepsilon_i = P$$

$$\Rightarrow x_s - \sum_{i=1}^n (k_i \varepsilon_i) / k_m = P / k_m$$

### ➤ Loaded Composite Mesh Error

$$e_m = \sum_{i=1}^n (k_i \varepsilon_i) / k_m$$

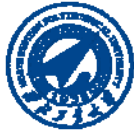

# Outline

---

- ① Background and Motivation
- ② Improved LTCA Model
- ③ **Dynamic Model**
- ④ Results and Discussion
- ⑤ Conclusions

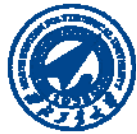

# Dynamic Model

## □ Helical Gear-Rotor-Bearing System

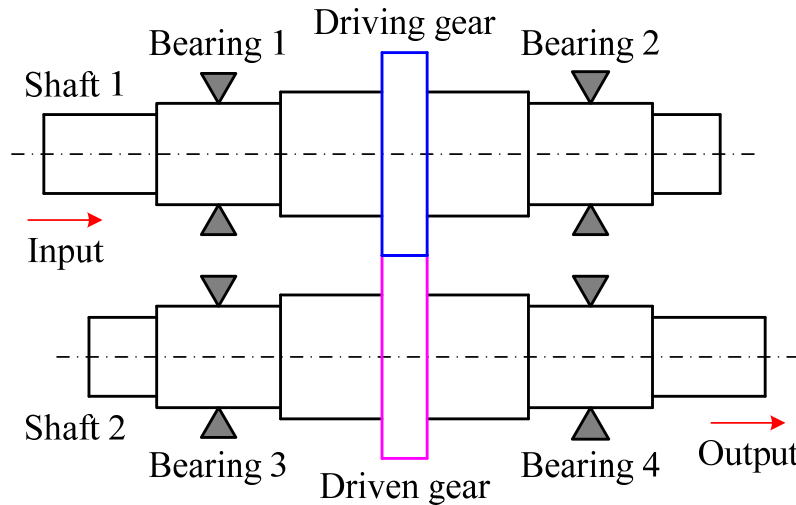

|                           |               |
|---------------------------|---------------|
| <b>Number of Teeth</b>    | <b>20/20</b>  |
| <b>Normal Module (mm)</b> | <b>10</b>     |
| <b>Pressure Angle (°)</b> | <b>20</b>     |
| <b>Helix Angle (°)</b>    | <b>25/-25</b> |
| <b>Face Width (mm)</b>    | <b>60</b>     |
| <b>Accuracy Grade</b>     | <b>ISO 6</b>  |

## □ Generalized Finite Element Dynamic Model

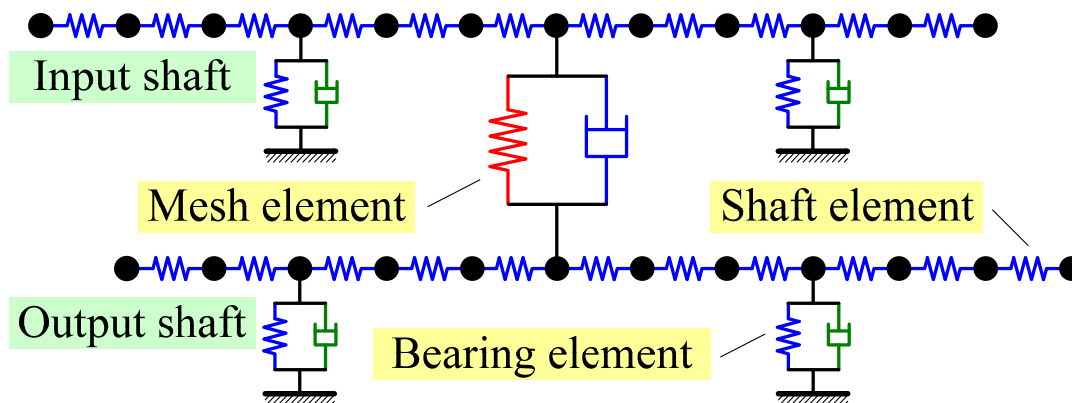

- ✓ Shaft Deformation
- ✓ Power Flow Direction
- ✓ Bearing Location
- ✓ Gear Mesh Excitation

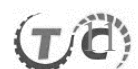



# Dynamic Model

## □ Shaft Element – Timoshenko beam

➤ The generalized coordinate vector

$$q_s = \{x_i, y_i, z_i, \theta_{xi}, \theta_{yi}, \theta_{zi}, x_{i+1}, y_{i+1}, z_{i+1}, \theta_{x(i+1)}, \theta_{y(i+1)}, \theta_{z(i+1)}\}^T$$

➤ The matrix form of motion equation

$$M_s \ddot{q}_s(t) + C_s \dot{q}_s(t) + K_s q_s(t) = 0$$

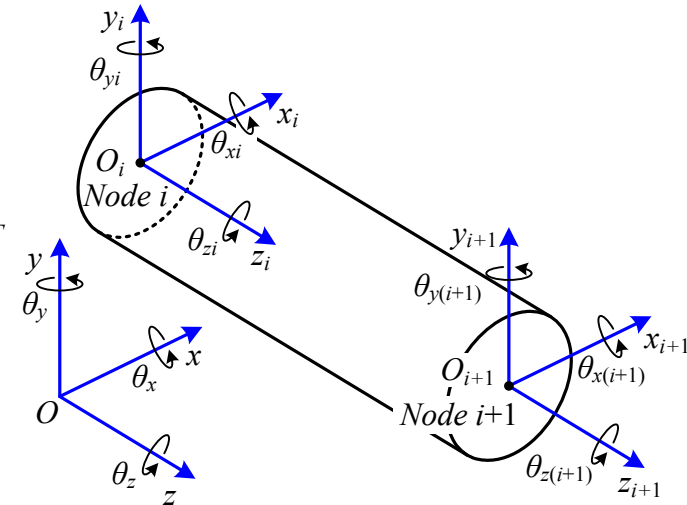

## □ Mesh Element

➤ The generalized coordinate vector

$$q_m = \{x_p, y_p, z_p, \theta_{xp}, \theta_{yp}, \theta_{zp}, x_g, y_g, z_g, \theta_{xg}, \theta_{yg}, \theta_{zg}\}^T$$

➤ The matrix form of motion equation

$$M_m \ddot{q}_m(t) + C_m \dot{q}_m(t) + K_m(t)[q_m(t) - e_m(t)] = 0$$

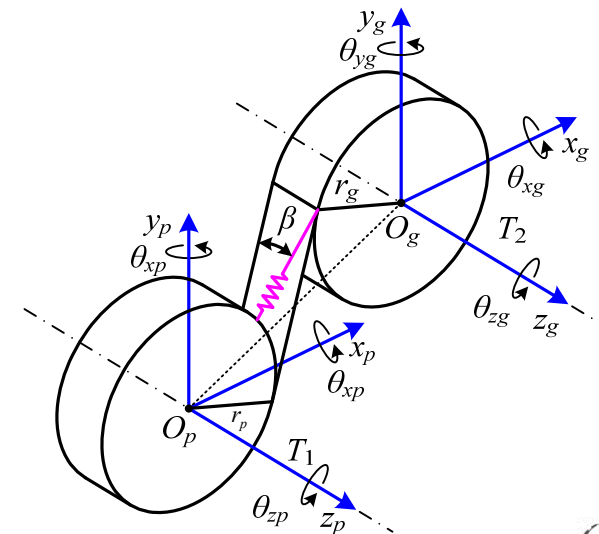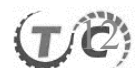



# Dynamic Model

## □ Bearing Element

- A spring-damping element that connects shaft node with foundation
- The matrix form of motion equation

$$M_b \ddot{q}_b(t) + C_b \dot{q}_b(t) + K_b q_b(t) = 0$$

- Both roller bearing and sliding bearing can be considered

## □ Finite Element Dynamic Model of the System

- The matrix form of static balance equation of gear system

$$K_G(t)[X_{Gs}(t) - E_G(t)] = P_{G0}$$

- The matrix form of global motion equation of the system

$$M_G \ddot{X}_G(t) + C_G \dot{X}_G(t) + K_G(t)[X_G(t) - E_G(t)] = P_{G0}$$

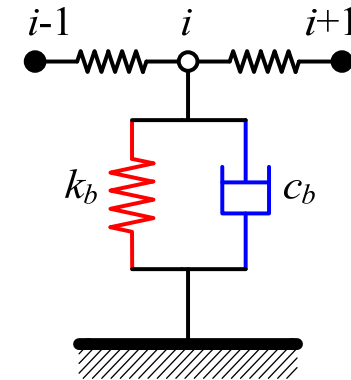



# Outline

---

- ① Background and Motivation
- ② Improved LTCA Model
- ③ Dynamic Model
- ④ **Results and Discussion**
- ⑤ Conclusions



# Results and Discussion – Short-Term Errors

## □ Assumption and Composite of Short-Term Gear Errors

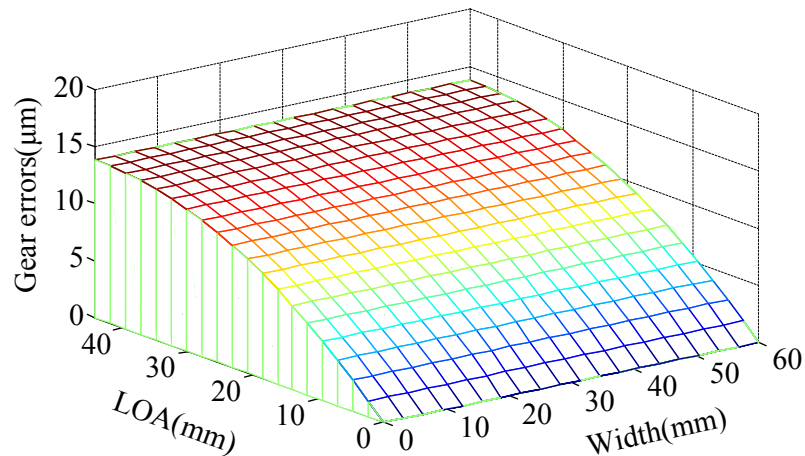

Profile errors

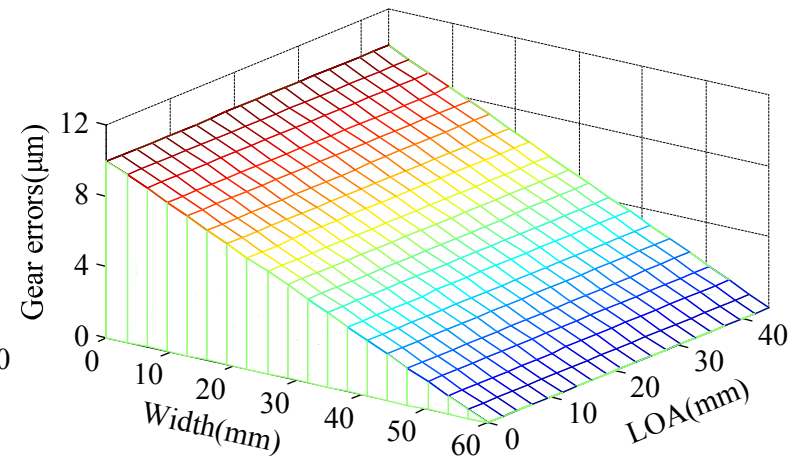

Helix errors

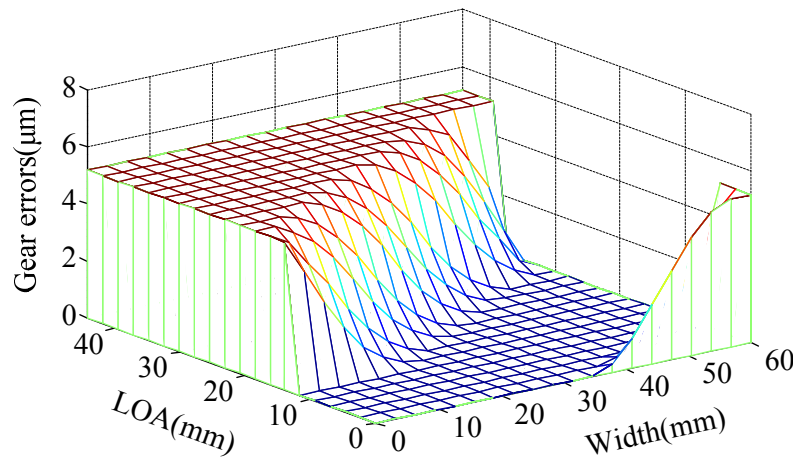

Pitch errors

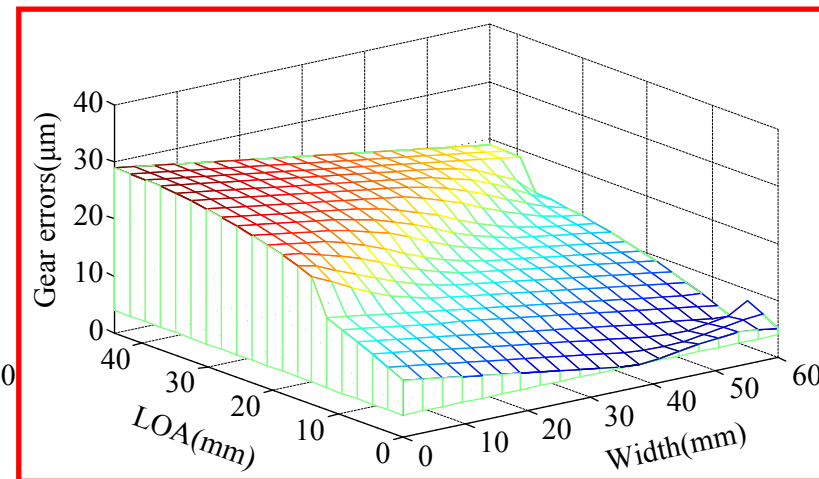

Composite errors



# Results and Discussion – Short-Term Errors

## Quasi-Static Analysis – TVMS, LSTE and LCMS

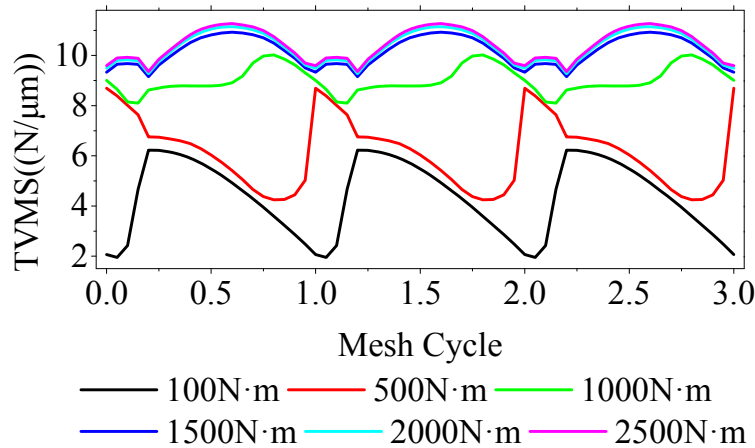

Time-Varying Mesh Stiffness (TVMS)

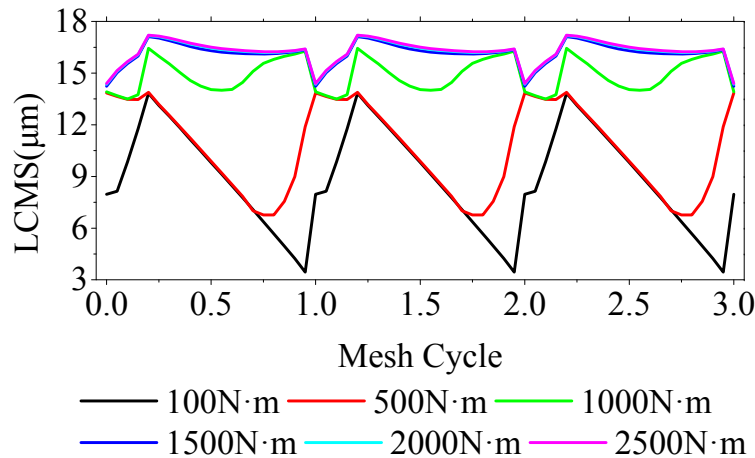

Loaded Composite Mesh Error (LCMS)

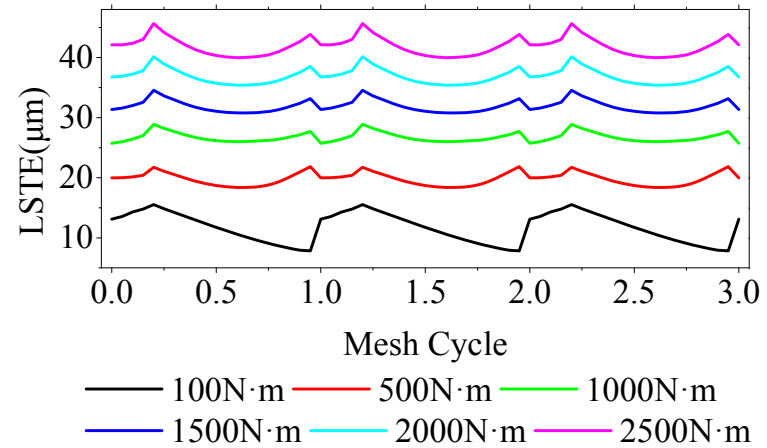

Loaded Static Transmission Error (LSTE)

- $T_{out} \downarrow$  TVMS  $\downarrow$  as a result of partial contact loss
- $T_{out} \uparrow$  LSTE  $\uparrow$  due to increased deformation of gear teeth
- $T_{out} \uparrow$  LCMS  $\uparrow$  due to enlarged contact pattern

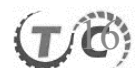





## Results and Discussion – Short-Term Errors

### □ Dynamic Analysis

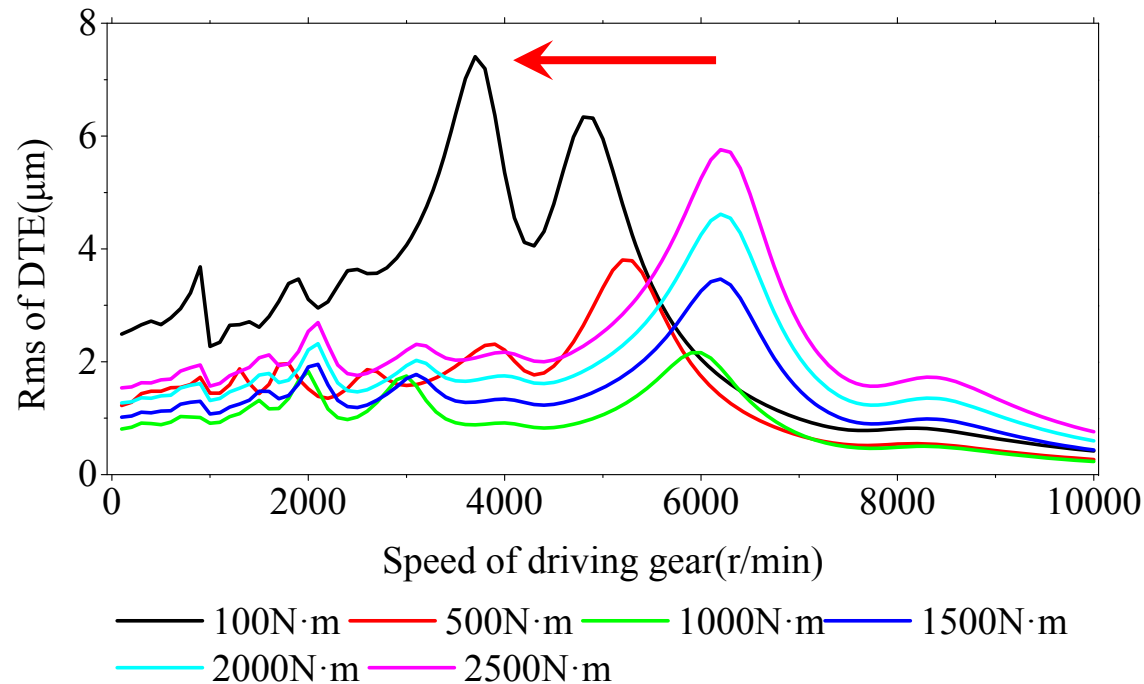

- **The resonance speed of the system decreases in lower applied torque as a result of the decreased mesh stiffness**
- **Lower applied torque will bring larger system vibration**



# Results and Discussion – Long-Term Errors

## □ Assumption of Accumulative Pitch Error

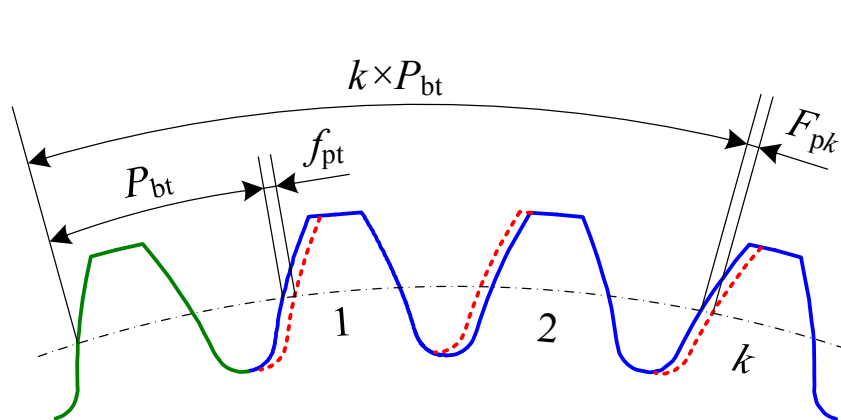

..... Actual tooth profile  
 — Theoretical tooth profile

- ✓  $P_{bt}$  - Theoretical Circular Pitch
- ✓  $f_{pt}$  - Circular Pitch Error
- ✓  $k \times f_{pt}$  - Accumulative Pitch Error

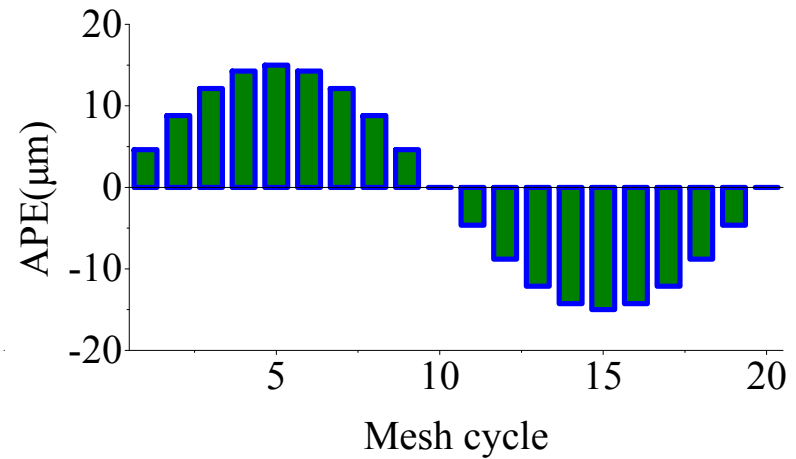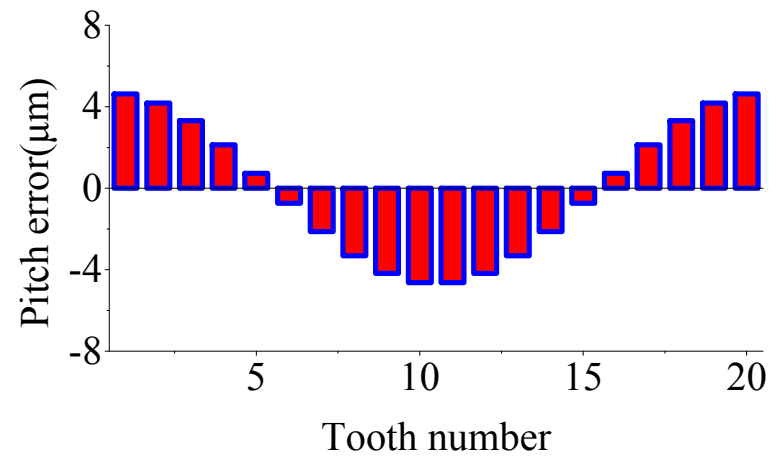

Accumulative pitch error (APE)

Assumption of Accumulative pitch error

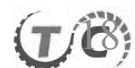



# Results and Discussion – Long-Term Errors

## Quasi-Static Analysis – TVMS, LSTE and LCMS

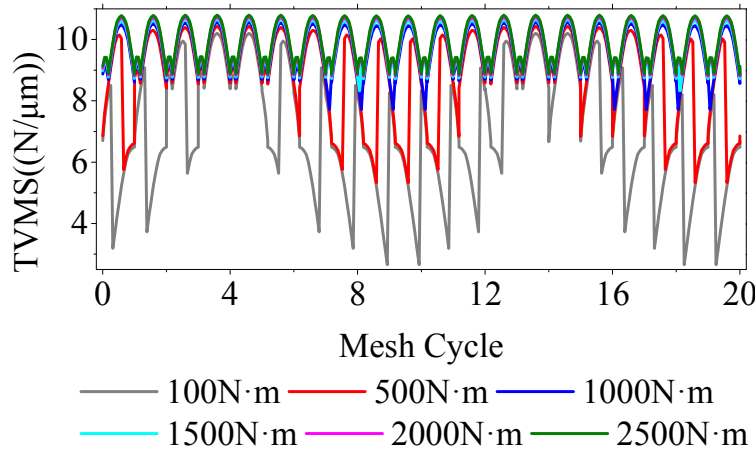

Time-Varying Mesh Stiffness (TVMS)

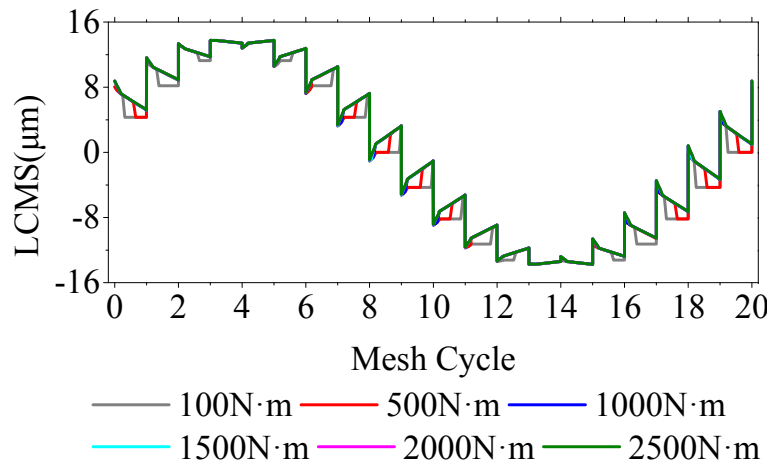

Loaded Composite Mesh Error (LCMS)

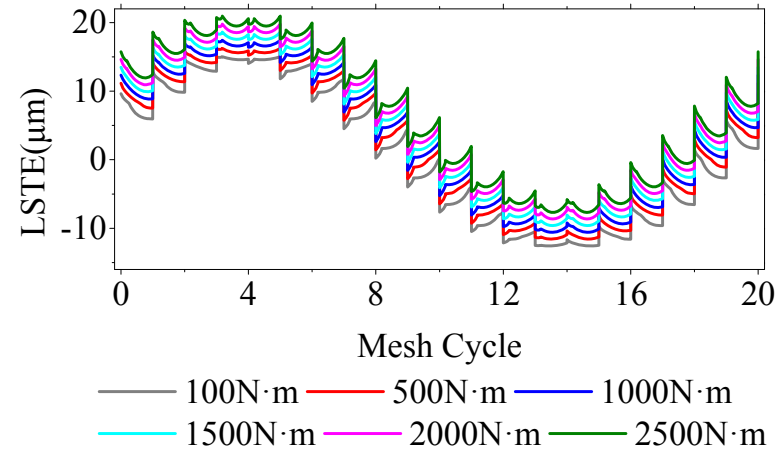

Loaded Static Transmission Error (LSTE)

- $T_{out} \downarrow$  TVMS  $\downarrow$  as a result of partial contact loss
- $T_{out} \uparrow$  LSTE  $\uparrow$  due to increased deformation of gear teeth
- $T_{out} \uparrow$  LCMS  $\uparrow$  due to enlarged contact pattern

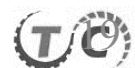



# Results and Discussion – Long-Term Errors

## □ Dynamic Analysis – Dynamic Transmission Error (DTE)

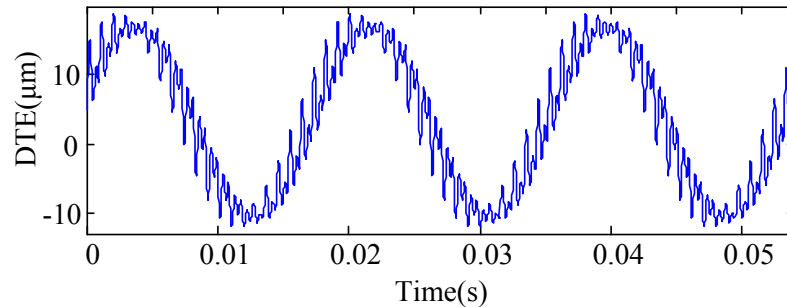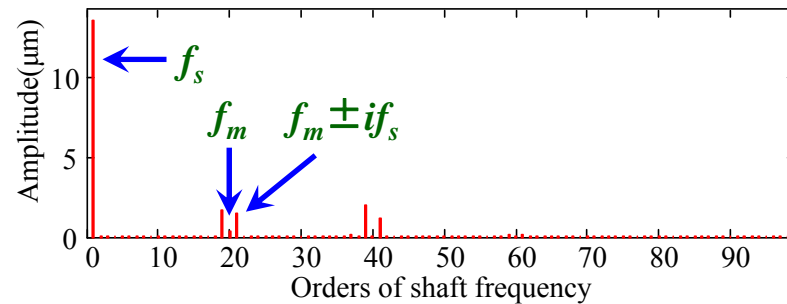

DTE at 300N·m applied torque

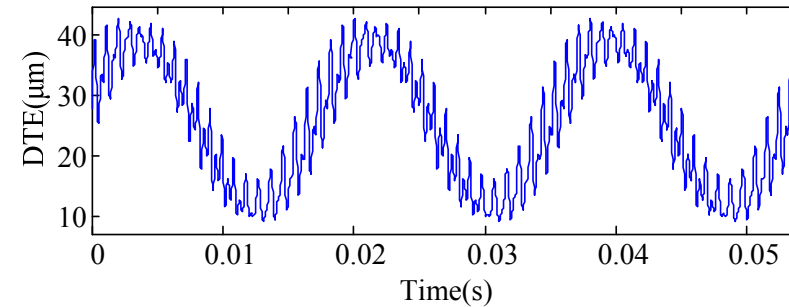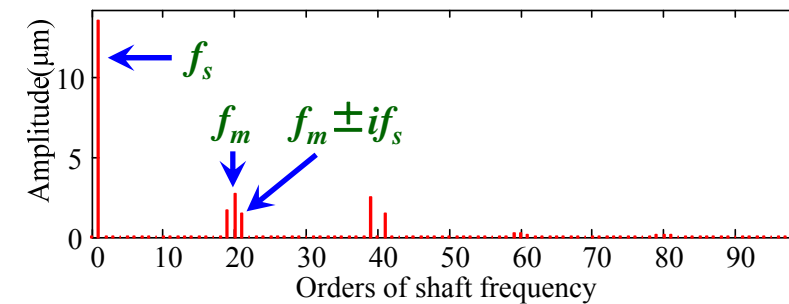

DTE at 2500N·m applied torque

- Shaft frequency is predominant
- Amplitude and frequency modulation can be observed
- The mesh frequency and its harmonic components increase as a result of increased applied torque

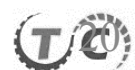



# Results and Discussion – Long-Term Errors

## □ Dynamic Analysis – Vibration Acceleration of Bearing (VAB)

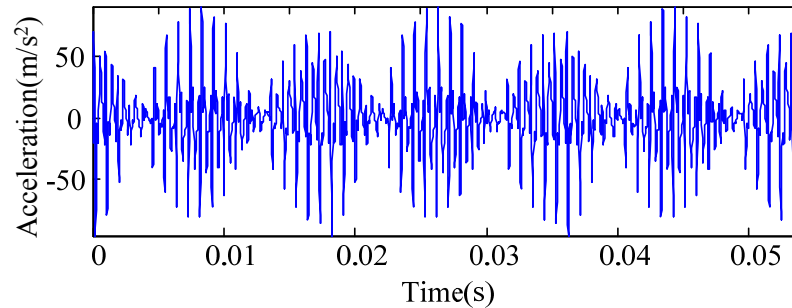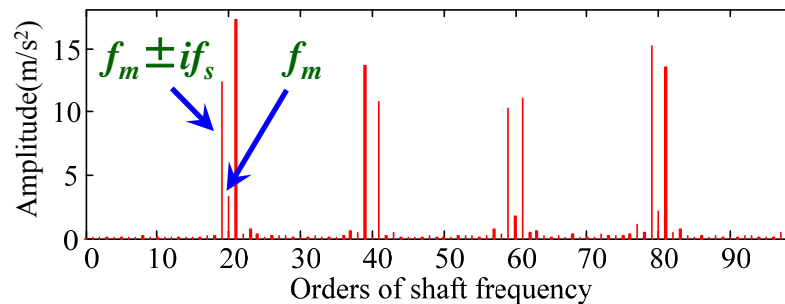

VAB at 300N·m applied torque

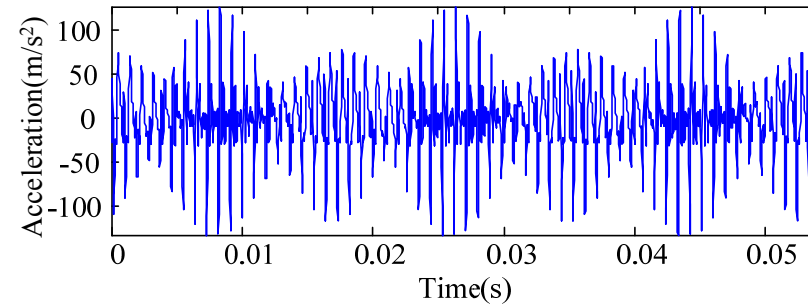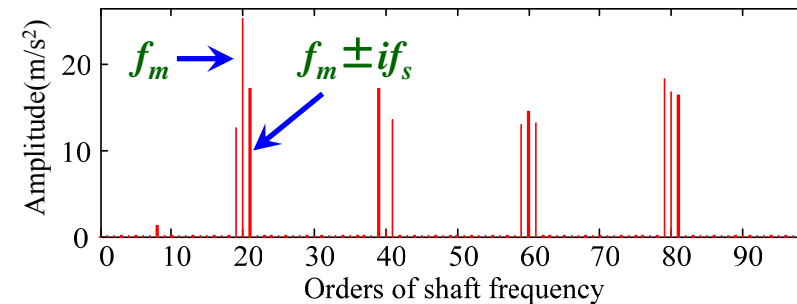

VAB at 2500N·m applied torque

- Amplitude and frequency modulation can be observed
- Sideband frequency components are predominant when applied torque is lower
- The mesh frequency and its harmonic components will be enhanced with the increase of applied torque

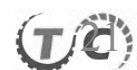



# Outline

---

- ① Background and Motivation
- ② Improved LTCA Model
- ③ Dynamic Model
- ④ Results and Discussion
- ⑤ **Conclusions**



# Conclusions

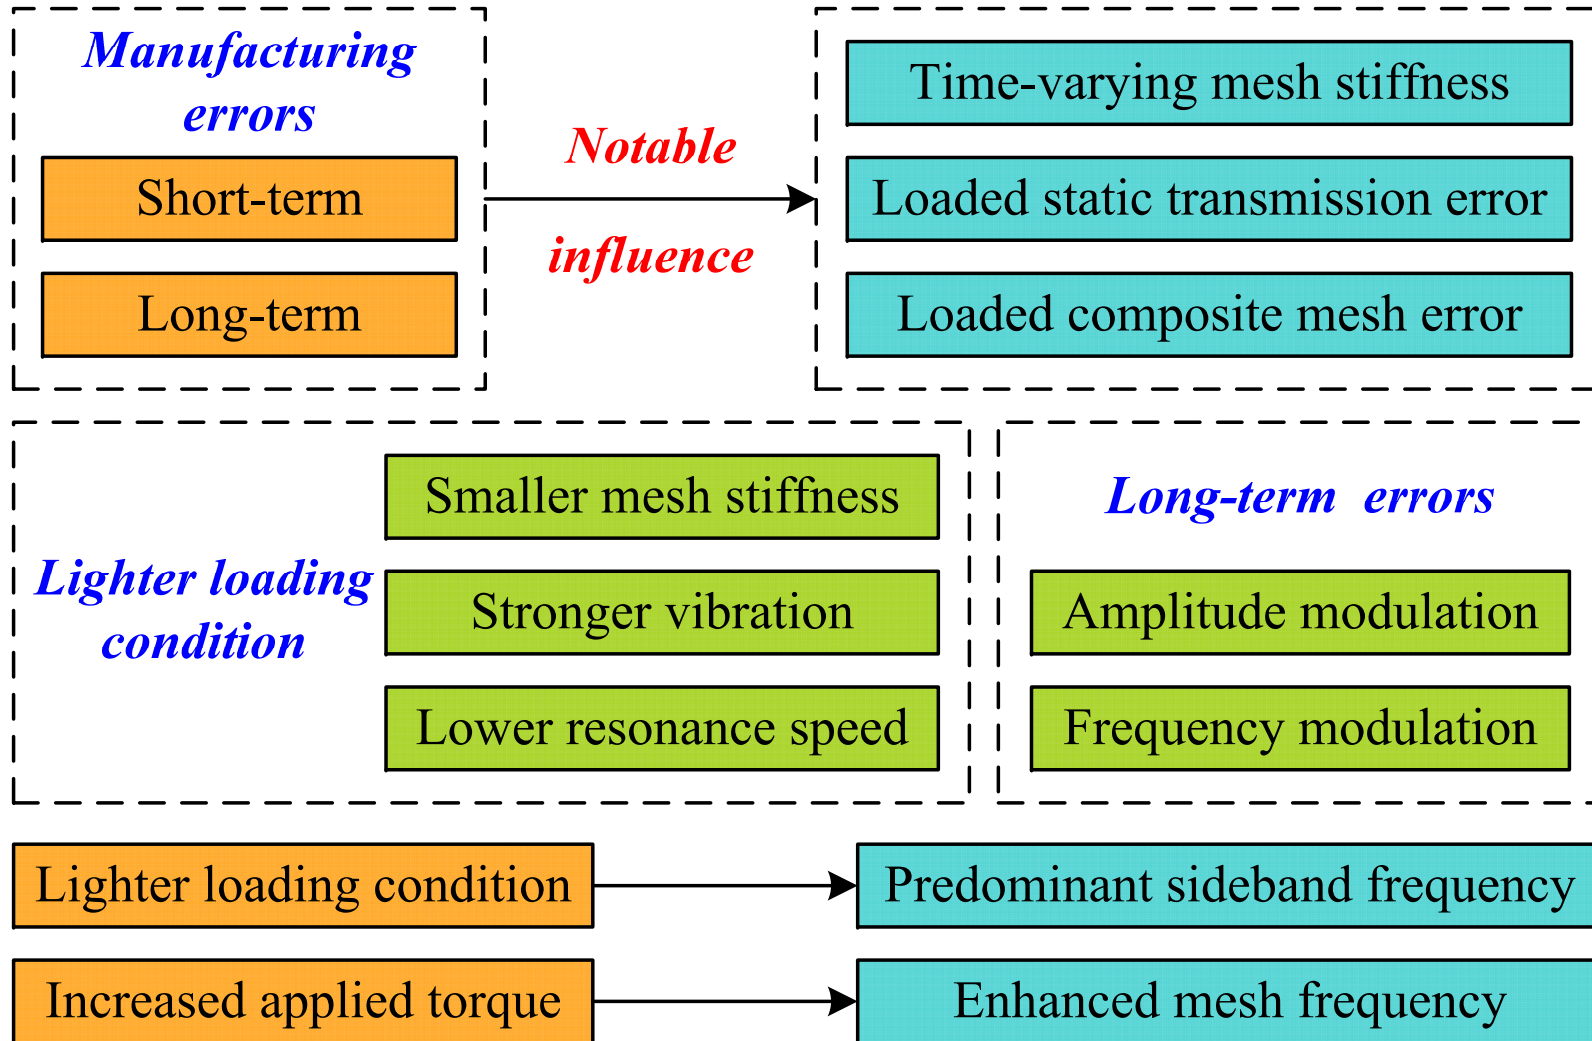

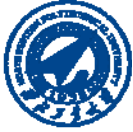

---

*Thanks for  
your attention!*

**Questions?**
